# Supplementary material for: Exposure to tobacco smoke and childhood rhinitis: a population-based study
Source: PubMed Central journal article supplement (PMC5311963; doi:10.1038/srep42836), 2017-02-16
Supplement: srep42836-s1.pdf [file srep42836-s1.pdf]

## Supplementary Information

### Exposure to tobacco smoke and childhood rhinitis: a population-based study

Tsung-Chieh Yao, MD, PhD<sup>1,2,3</sup>; Su-Wei Chang, PhD<sup>4</sup>; Wei-Chiao Chang, PhD<sup>5</sup>; Ming-Han Tsai, MD, PhD<sup>3,6</sup>; Sui-Ling Liao, MD<sup>3,6</sup>; Man-Chin Hua, MD<sup>3,6</sup>; Shen-Hao Lai, MD<sup>3,7</sup>; Kuo-Wei Yeh, MD<sup>1,3</sup>; Yu-Lun Tseng, BS<sup>1,3</sup>; Wan-Chen Lin, MS<sup>1,3</sup>; Hui-Ju Tsai, MPH, PhD<sup>8,9,10</sup>; Jing-Long Huang, MD<sup>1,3</sup>.

<sup>1</sup>Division of Allergy, Asthma, and Rheumatology, Department of Pediatrics, Chang Gung Memorial Hospital and Chang Gung University College of Medicine, Taoyuan, Taiwan

<sup>2</sup>Chang Gung Immunology Consortium, Chang Gung Memorial Hospital and Chang Gung University College of Medicine, Taoyuan, Taiwan

<sup>3</sup>Community Medicine Research Center, Chang Gung Memorial Hospital at Keelung, Keelung, Taiwan

<sup>4</sup>Clinical Informatics and Medical Statistics Research Center, Chang Gung University College of Medicine, Taoyuan, Taiwan

<sup>5</sup>Department of Clinical Pharmacy, College of Pharmacy, Taipei Medical University, Taipei, Taiwan

<sup>6</sup>Department of Pediatrics, Chang Gung Memorial Hospital at Keelung, Keelung, Taiwan

<sup>7</sup>Division of Pediatric Pulmonology, Department of Pediatrics, Chang Gung Memorial Hospital, Taoyuan, Taiwan

<sup>8</sup>Division of Biostatistics and Bioinformatics, Institutes of Population Health Sciences, National Health Research Institutes, Miaoli, Taiwan

<sup>9</sup>Department of Pediatrics, Feinberg School of Medicine, Northwestern University, Chicago, IL, USA

<sup>10</sup>Department of Public Health, China Medical University, Taichung, Taiwan

**Supplemental Table 1.** Association of serum cotinine levels (in tertiles) with rhinitis in 1,315 study participants\*.

|                                     | No. (%)    | Crude OR<br>(95% CI) | <i>P</i> | Adjusted OR<br>(95% CI) <sup>†</sup> | <i>P</i> <sup>†</sup> |
|-------------------------------------|------------|----------------------|----------|--------------------------------------|-----------------------|
| <b>Rhinitis ever</b>                | 566 (43.6) |                      |          |                                      |                       |
| <b>1<sup>st</sup> tertile</b>       | 189 (33.4) | Ref                  |          | Ref                                  |                       |
| <b>2<sup>nd</sup> tertile</b>       | 172 (30.4) | 1.03 (0.78-1.35)     | 0.84     | 1.02 (0.78-1.34)                     | 0.90                  |
| <b>3<sup>rd</sup> tertile</b>       | 205 (36.2) | 1.18 (0.91-1.54)     | 0.21     | 1.26 (0.95-1.67)                     | 0.10                  |
| <b>Current rhinitis</b>             | 524 (40.8) |                      |          |                                      |                       |
| <b>1<sup>st</sup> tertile</b>       | 175 (33.4) | Ref                  |          | Ref                                  |                       |
| <b>2<sup>nd</sup> tertile</b>       | 157 (30.0) | 1.00 (0.76-1.32)     | 0.99     | 0.99 (0.75-1.31)                     | 0.96                  |
| <b>3<sup>rd</sup> tertile</b>       | 192 (36.6) | 1.23 (0.94-1.60)     | 0.13     | <b>1.33 (1.01-1.77)</b>              | <b>0.04</b>           |
| <b>Physician-diagnosed rhinitis</b> | 481 (37.6) |                      |          |                                      |                       |
| <b>1<sup>st</sup> tertile</b>       | 154 (32.0) | Ref                  |          | Ref                                  |                       |
| <b>2<sup>nd</sup> tertile</b>       | 150 (31.2) | 1.14 (0.86-1.51)     | 0.35     | 1.14 (0.86-1.52)                     | 0.37                  |
| <b>3<sup>rd</sup> tertile</b>       | 177 (36.8) | 1.29 (0.98-1.70)     | 0.07     | 1.32 (0.99-1.76)                     | 0.06                  |

OR, odds ratio; CI, confidence interval.

\*Serum cotinine levels were treated as a categorical variable (in tertiles). *P*-values less than 0.05 are in bold.

<sup>†</sup>Adjusted covariates included age, gender, and body mass index.
